# Supplementary material for: Facile access to N-substituted anilines via dehydrogenative aromatization catalysis over supported gold–palladium bimetallic nanoparticles
Source: Royal Society of Chemistry journal article supplement (doi:10.1039/c5cy01908g), 2016-01-01
Supplement: c5cy01908g1.pdf [file c5cy01908g1.pdf]

*Electronic Supplementary Information (ESI) for*

## **Facile access to *N*-substituted anilines via dehydrogenative aromatization catalysis over supported gold–palladium bimetallic nanoparticles**

Kento Taniguchi, Xiongjie Jin, Kazuya Yamaguchi and Noritaka Mizuno\*

*Department of Applied Chemistry, School of Engineering, The University of Tokyo,  
7-3-1 Hongo, Bunkyo-ku, Tokyo 113-8656, Japan.*

Email: tmizuno@mail.ecc.u-tokyo.ac.jp

### **Effect of catalyst preparation methods**

As described in Experimental section, Au–Pd/Al<sub>2</sub>O<sub>3</sub> used in this study was prepared by "co-precipitation" of gold and palladium hydroxide precursors on Al<sub>2</sub>O<sub>3</sub>, followed by the reduction using H<sub>2</sub>. By this procedure, Au–Pd alloy nanoparticles with the average size of 2.9 nm were formed on the support (Fig. 1). This Au–Pd/Al<sub>2</sub>O<sub>3</sub> catalyst showed the high catalytic performance for the present dehydrogenative aromatization. Under the conditions described in Table 1, the desired aniline **3aa** was produced in 59% yield (Table 1, entry 3).

One referee pointed out the importance of the preparation method for such kinds of bimetallic catalysts. Thus, according to the comment, we prepared two Au–Pd/Al<sub>2</sub>O<sub>3</sub> catalysts with different orders of the component supporting (see the following **Methods A** and **B**), and their catalytic performances were examined for the dehydrogenative aromatization of **1a** with **2a** under the conditions described in Table 1.

**(Method A)** Initially, Pd/Al<sub>2</sub>O<sub>3</sub> was prepared. Then, the gold hydroxide species was precipitated onto Pd/Al<sub>2</sub>O<sub>3</sub>, followed by the H<sub>2</sub> reduction (Au: 0.109 mmol g<sup>-1</sup>, Pd: 0.120 mmol g<sup>-1</sup>). The notation of this catalyst is Au–Pd/Al<sub>2</sub>O<sub>3</sub>(Pd→Au). It was confirmed by the TEM analysis that the average size of nanoparticles in Au–Pd/Al<sub>2</sub>O<sub>3</sub>(Pd→Au) was 3.5 nm (Fig. S6). When using Au–Pd/Al<sub>2</sub>O<sub>3</sub>(Pd→Au) for the dehydrogenative aromatization of **1a** with **2a**, 62% yield of **3aa** was obtained. Thus, the catalytic performance of Au–Pd/Al<sub>2</sub>O<sub>3</sub>(Pd→Au) was almost the same as that of Au–Pd/Al<sub>2</sub>O<sub>3</sub> (59% yield, Table 1, entry 3).

**(Method B)** Initially, Au/Al<sub>2</sub>O<sub>3</sub> was prepared. Then, the palladium hydroxide species was precipitated onto Au/Al<sub>2</sub>O<sub>3</sub>, followed by the H<sub>2</sub> reduction (Au: 0.115 mmol g<sup>-1</sup>, Pd: 0.128 mmol g<sup>-1</sup>). The notation of this catalyst is Au–Pd/Al<sub>2</sub>O<sub>3</sub>(Au→Pd). As shown in Fig. S7a, the average size of nanoparticles (6.3 nm) and the size distribution were relatively larger than those of Au–Pd/Al<sub>2</sub>O<sub>3</sub> and Au–Pd/Al<sub>2</sub>O<sub>3</sub>(Pd→Au). It was revealed by the HAADF-STEM and EDS analyses that the larger particles (>5 nm) were mainly core–shell (Au<sub>core</sub>–Pd<sub>shell</sub>) and palladium nanoparticles and that the smaller ones (<3 nm) were predominantly palladium (Fig. S7b–d). Therefore, **Method B** is not suitable for preparation of Au–Pd

alloy nanoparticles. When the reaction was performed using Au–Pd/Al<sub>2</sub>O<sub>3</sub>(Au→Pd), the desired **3aa** was obtained in 39% yield, and the performance was significantly inferior to those of Au–Pd/Al<sub>2</sub>O<sub>3</sub> and Au–Pd/Al<sub>2</sub>O<sub>3</sub>(Pd→Au).

### Compound data

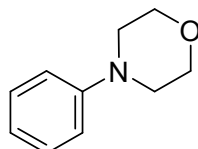

**3aa (CAS registry number: 92-53-5)**

**4-Phenylmorpholine (3aa).** <sup>1</sup>H NMR (500 MHz, CDCl<sub>3</sub>, 25 °C, TMS):  $\delta$  = 7.28–7.25 (m, 2H), 6.91–6.86 (m, 3H), 3.84 (t,  $J$  = 4.5 Hz, 4H), 3.13 (t,  $J$  = 4.3 Hz, 4H); <sup>13</sup>C {<sup>1</sup>H} NMR (125 MHz, CDCl<sub>3</sub>, 25 °C, TMS):  $\delta$  = 151.5, 129.4, 120.3, 116.0, 67.2, 49.6; MS (70 eV, EI):  $m/z$  (%): 163 (58) [ $M^+$ ], 164 (6), 162 (5), 132 (6), 106 (10), 105 (100), 104 (41), 91 (5), 78 (5), 77 (30), 51 (11).

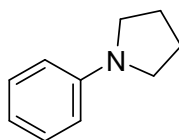

**3ab (CAS registry number: 4096-21-3)**

**1-Phenylpyrrolidine (3ab).** MS (70 eV, EI):  $m/z$  (%): 147 (76) [ $M^+$ ], 148 (8), 146 (100), 144 (6), 119 (8), 118 (5), 104 (18), 91 (49), 77 (29), 51 (10), .

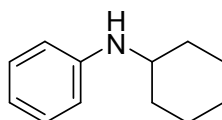

**3ac (CAS registry number: 1821-36-9)**

**N-Cyclohexylbenzenamine (3ac).** <sup>1</sup>H NMR (500 MHz, CDCl<sub>3</sub>, 25 °C, TMS):  $\delta$  = 7.16–7.12 (m, 2H), 6.64 (tt,  $J$  = 7.5 and 1.0 Hz, 1H), 6.58–6.56 (m, 2H), 3.49 (brs, 1H), 3.26–3.21 (m, 1H), 2.06–2.03 (m, 2H), 1.77–1.72 (m, 2H), 1.67–1.61 (m, 1H), 1.40–1.31 (m, 2H), 1.25–1.09 (m, 3H); <sup>13</sup>C {<sup>1</sup>H} NMR (125 MHz, CDCl<sub>3</sub>, 25 °C, TMS):  $\delta$  = 147.7, 129.5, 117.1, 113.4, 51.9, 33.8, 26.2, 25.3; MS (70 eV, EI):  $m/z$  (%): 175 (34) [ $M^+$ ], 133 (12), 132 (100), 119 (12), 118 (15), 117 (9), 106 (9), 93 (12), 91 (5), 77 (10).

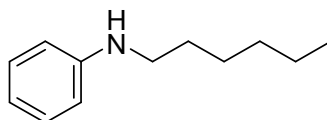

**3ad (CAS registry number: 4746-32-1)**

**N-Hexylbenzenamine (3ac).** MS (70 eV, EI):  $m/z$  (%): 177 (15) [ $M^+$ ], 107 (8), 106 (100), 79 (5), 77 (9).

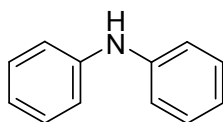

**3ae (CAS registry number: 122-39-4)**

**N-Phenylbenzenamine (3ae).**  $^1\text{H}$  NMR (500 MHz,  $\text{CDCl}_3$ , 25 °C, TMS):  $\delta$  = 7.27–7.24 (m, 4H), 7.06 (d,  $J$  = 8.5 Hz, 4H), 6.92 (t,  $J$  = 7.0 Hz, 2H), 5.67 (brs, 1H);  $^{13}\text{C}$   $\{^1\text{H}\}$  NMR (125 MHz,  $\text{CDCl}_3$ , 25 °C, TMS):  $\delta$  = 143.4, 130.0, 121.3, 118.1; MS (70 eV, EI):  $m/z$  (%): 169 (100) [ $M^+$ ], 170 (13), 168 (58), 167 (30), 166 (5), 141 (5), 115 (5), 84 (16), 77 (11), 66 (8), 65 (7), 51 (12).

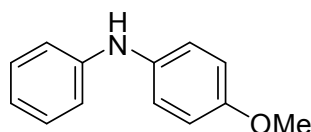

**3af (CAS registry number: 1208-86-2)**

**4-Methoxy-N-phenylbenzenamine (3af).** MS (70 eV, EI):  $m/z$  (%): 199 (75) [ $M^+$ ], 200 (11), 185 (13), 184 (100), 167 (5), 155 (5), 154 (9), 129 (15), 128 (12), 77 (12), 51 (7).

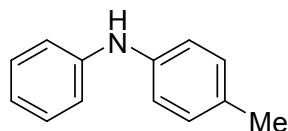

**3ag (CAS registry number: 620-84-8)**

**4-Methyl-N-phenylbenzenamine (3ag).** MS (70 eV, EI):  $m/z$  (%): 183 (100) [ $M^+$ ], 184 (15), 182 (53), 180 (7), 168 (6), 167 (19), 91 (16), 90 (6), 77 (10), 65 (5), 51 (5).

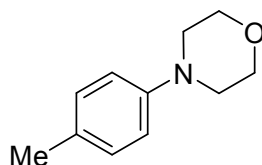

**3ba (CAS registry number: 3077-16-5)**

**4-(4-Methylphenyl)morpholine (3ba).** MS (70 eV, EI):  $m/z$  (%): 177 (49) [ $M^+$ ], 178 (6), 120 (10), 119 (100), 118 (28), 91 (44), 90 (5), 89 (5), 77 (5), 65 (15), 51 (5).

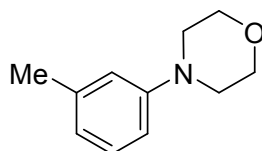

**3ca (CAS registry number: 7025-91-4)**

**4-(3-Methylphenyl)morpholine (3ca).** MS (70 eV, EI):  $m/z$  (%): 177 (47) [ $M^+$ ], 178 (6), 146 (5), 120 (10), 119 (100), 118 (33), 92 (5), 91 (34), 89 (5), 77 (5), 65 (16).

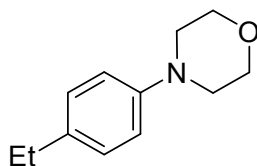

**3da (CAS registry number: 1207717-24-5)**

**4-(4-Ethylphenyl)morpholine (3ca).** MS (70 eV, EI):  $m/z$  (%): 191 (78) [ $M^+$ ], 192 (10), 190 (6), 177 (5), 176 (39), 134 (11), 133 (100), 132 (15), 130 (6), 119 (12), 118 (98), 117 (9), 105 (19), 104 (9), 103 (10), 91 (16), 90 (8), 89 (6), 79 (8), 78 (8), 77 (19), 65 (8), 51 (7).

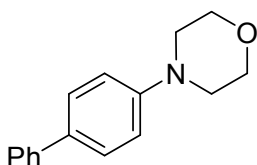

**3ea (CAS registry number: 169963-54-6)**

**4-[1,1'-biphenyl]-4-ylmorpholine (3ea).** MS (70 eV, EI):  $m/z$  (%): 239 (86) [ $M^+$ ], 240 (15), 238 (5), 182 (15), 181 (100), 180 (22), 167 (6), 154 (5), 153 (27), 152 (37), 151 (9), 147 (5), 90 (21), 77 (8), 76 (15), 73 (18).

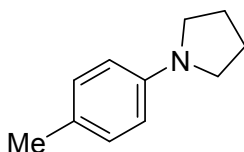

**3bb (CAS registry number: 54104-82-4)**

**1-(4-Methylphenyl)pyrrolidine (3bb).** MS (70 eV, EI):  $m/z$  (%): 161 (75) [ $M^+$ ], 162 (8), 160 (100), 133 (5), 118 (16), 117 (6), 105 (43), 91 (23), 77 (5), 65 (11).

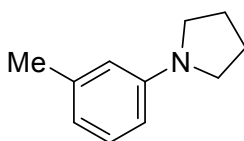

**3cb (CAS registry number: 71982-22-4)**

**1-(3-Methylphenyl)pyrrolidine (3cb).** MS (70 eV, EI):  $m/z$  (%): 161 (73) [ $M^+$ ], 162 (8), 160 (100), 133 (6), 118 (13), 117 (5), 106 (5), 105 (43), 91 (23), 77 (5), 65 (12).

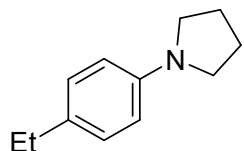

**3db (CAS registry number: 872874-50-5)**

**1-(4-Ethylphenyl)pyrrolidine (3db).** MS (70 eV, EI):  $m/z$  (%): 175 (52) [ $M^+$ ], 176 (7), 174 (28), 161 (12), 160 (100), 132 (5), 130 (5), 119 (13), 118 (10), 117 (5), 91 (8), 77 (7).

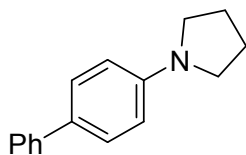

**3eb (CAS registry number: 265991-28-4)**

**1-[1,1'-biphenyl]-4-ylpyrrolidine (3eb).** MS (70 eV, EI):  $m/z$  (%): 223 (100) [ $M^+$ ], 224 (17), 222 (81), 180 (8), 167 (25), 165 (6), 153 (14), 152 (23), 151 (6), 112 (6), 90 (6), 76 (8).

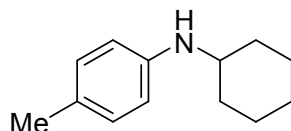

**3bc (CAS registry number: 10386-93-3)**

**N-Cyclohexyl-4-methylbenzenamine (3bc).** MS (70 eV, EI):  $m/z$  (%): 189 (38) [ $M^+$ ], 190 (5), 147 (13), 146 (100), 133 (15), 132 (10), 131 (14), 130 (7), 120 (9), 118 (7), 107 (10), 106 (14), 91 (10), 77 (6), 65 (5).

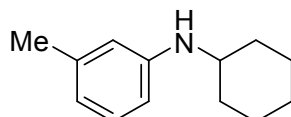

**3cc (CAS registry number: 65021-67-2)**

**N-Cyclohexyl-3-methylbenzenamine (3cc).** MS (70 eV, EI):  $m/z$  (%): 189 (38) [ $M^+$ ], 190 (6), 147 (13), 146 (100), 133 (12), 132 (11), 131 (14), 130 (6), 120 (8), 118 (8), 117 (5), 107 (9), 106 (7), 91 (10), 65 (5).

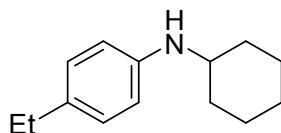

**3dc (CAS registry number: 801192-87-0)**

**N-Cyclohexyl-4-ethylbenzenamine (3dc).** MS (70 eV, EI):  $m/z$  (%): 203 (50) [ $M^+$ ], 204 (8), 188 (7), 161 (15), 160 (100), 147 (15), 134 (8), 132 (23), 131 (12), 130 (13), 118 (5), 106 (21), 105 (7), 91 (5), 79 (5), 77 (7).

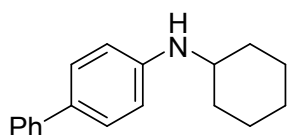

**3ec (CAS registry number: 887748-95-0)**

**N-Cyclohexyl-[1,1'-biphenyl]-4-amine (3ec).** MS (70 eV, EI):  $m/z$  (%): 251 (82) [ $M^+$ ], 252 (16), 209 (19), 208 (100), 195 (15), 194 (11), 193 (15), 182 (8), 180 (5), 169 (17), 168 (8), 167 (9), 153 (6), 152

(12), 141 (6), 115 (6), 104 (6), 55 (5).

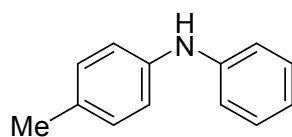

**3be (CAS registry number: 620-84-8)**

**4-Methyl-*N*-phenylbenzenamine (3be).** MS (70 eV, EI):  $m/z$  (%): 183 (100) [ $M^+$ ], 184 (14), 182 (53), 180 (7), 168 (7), 167 (20), 91 (20), 90 (8), 77 (13), 65 (6), 51 (7).

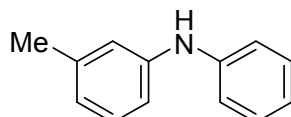

**3ce (CAS registry number: 1205-64-7)**

**3-Methyl-*N*-phenylbenzenamine (3ce).** MS (70 eV, EI):  $m/z$  (%): 183 (100) [ $M^+$ ], 184 (14), 182 (28), 180 (6), 168 (16), 167 (35), 91 (11), 77 (9), 65 (6), 51 (5).

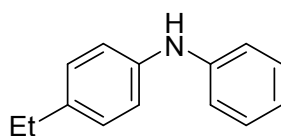

**3de (CAS registry number: 32804-22-1)**

**4-Ethyl-*N*-phenylbenzenamine (3de).** MS (70 eV, EI):  $m/z$  (%): 197 (50) [ $M^+$ ], 198 (8), 183 (15), 182 (100), 180 (6), 168 (5), 167 (11), 91 (5), 90 (8), 77 (11), 51 (5).

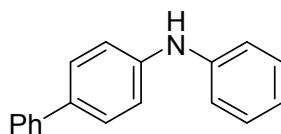

**3ee (CAS registry number: 32228-99-2)**

***N*-Phenyl-[1,1'-biphenyl]-4-amine (3ee).** MS (70 eV, EI):  $m/z$  (%): 245 (100) [ $M^+$ ], 246 (20), 244 (20), 243 (6), 167 (6), 152 (5), 115 (5).

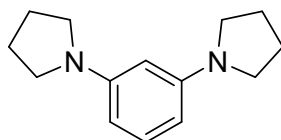

**3fb (CAS registry number: 27594-18-9)**

**1,1'-(1,3-phenylene)bispyrrolidine (3fb).** MS (70 eV, EI):  $m/z$  (%): 216 (100) [ $M^+$ ], 217 (15), 215 (71), 189 (6), 188 (33), 187 (30), 174 (6), 173 (20), 161 (8), 160 (7), 147 (6), 146 (18), 145 (5), 132 (5), 118 (9), 117 (8), 108 (9), 107 (10), 104 (7), 91 (10), 86 (5), 77 (7), 65 (6).

**Table S1** Hydrogenation of various hydrogen acceptors using Au–Pd/Al<sub>2</sub>O<sub>3</sub><sup>a</sup>

| Entry | Hydrogen acceptor | Hydrogenated product | Yield (%) |
|-------|-------------------|----------------------|-----------|
| 1     | styrene           | ethylbenzene         | >99       |
| 2     | <b>4aa</b>        | <b>5aa</b>           | 65        |
| 3     | 1-octene          | <i>n</i> -octane     | 63        |
| 4     | cyclooctene       | cyclooctane          | 66        |

<sup>a</sup> Reaction conditions: Au–Pd/Al<sub>2</sub>O<sub>3</sub> (Au: 0.4 mol%, Pd: 0.6 mol% with respect to hydrogen acceptor), hydrogen acceptor (1.0 mmol), ethanol (2 mL), room temperature, H<sub>2</sub> (1 atm), 1 h. Yields were determined by GC analysis using *n*-decane as an internal standard.

**Table S2** Results of the repeated reuse experiments for the dehydrogenative aromatization of **1a** with **2a**<sup>a</sup>

| Au-Pd/Al <sub>2</sub> O <sub>3</sub> | Yield of <b>3aa</b> (%) | Average particle size (nm) |
|--------------------------------------|-------------------------|----------------------------|
| Fresh                                | 76                      | 2.9                        |
| First reuse                          | 67                      | 3.8                        |
| Second reuse                         | 49                      | 4.3                        |

<sup>a</sup> The reaction was carried out under the conditions described in Fig. 3.



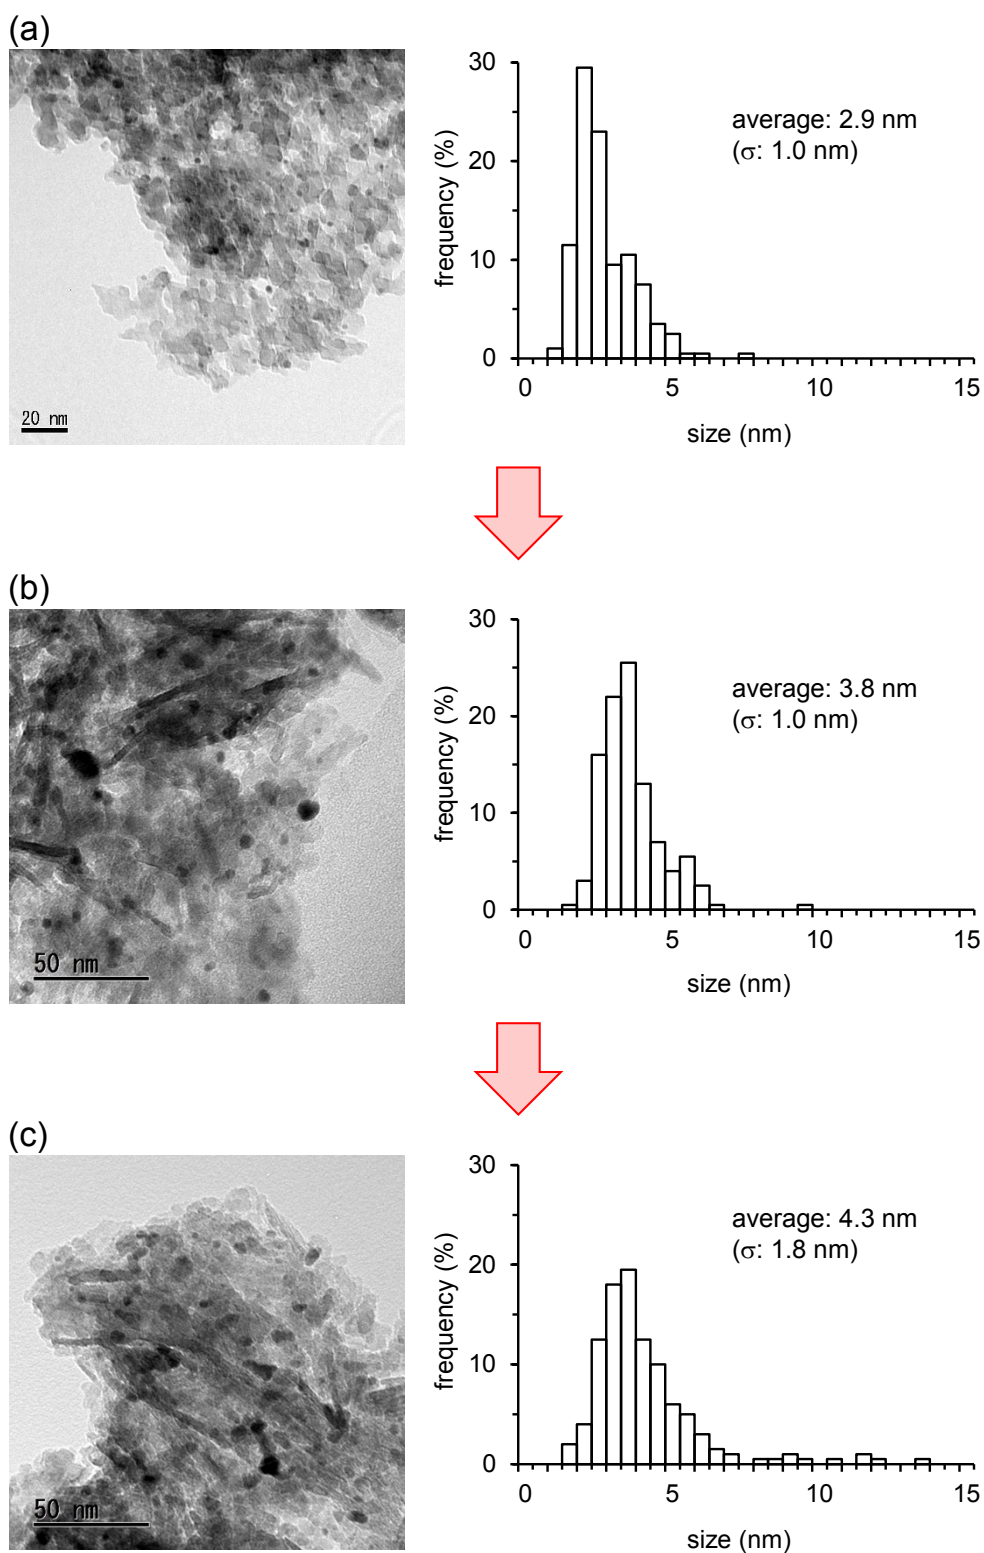

**Fig. S1** TEM images of Au–Pd/Al<sub>2</sub>O<sub>3</sub> and the size distributions of bimetallic nanoparticles. (a) Fresh (before the first use) (average: 2.9 nm,  $\sigma$ : 1.0 nm). (b) After the first use (average: 3.8 nm,  $\sigma$ : 1.0 nm). (c) After the second use (average: 4.3 nm,  $\sigma$ : 1.8 nm). The size distributions were determined using 200 particles.

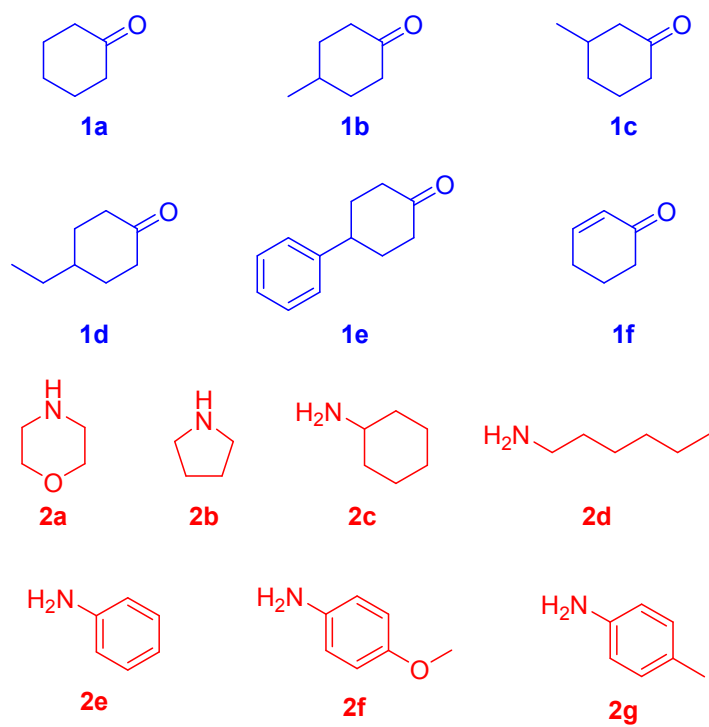

**Fig. S2** Cyclohexanones and amines used in this study.

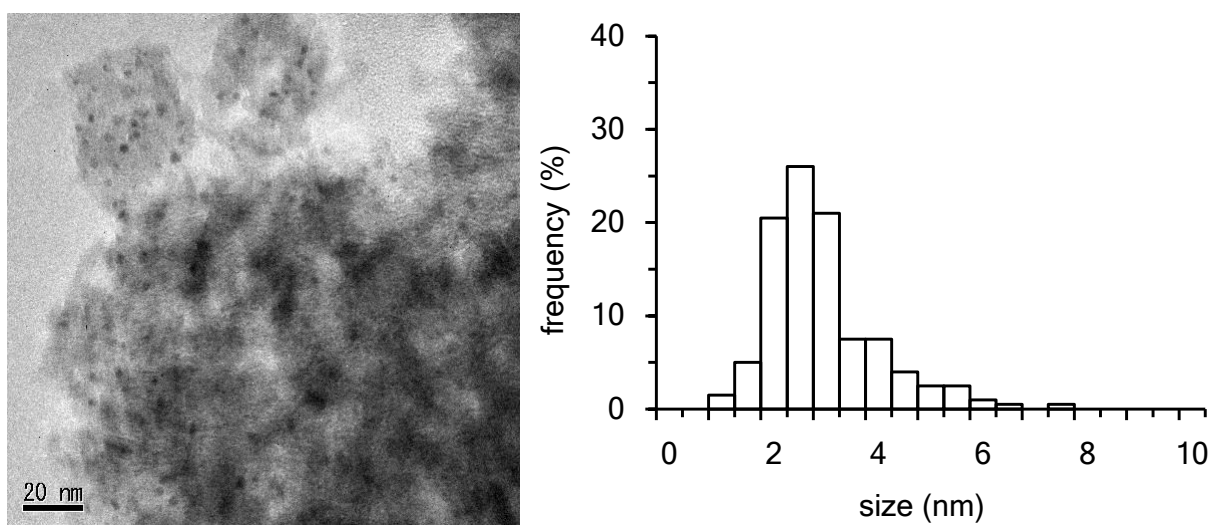

**Fig. S3** TEM image of Au/Al<sub>2</sub>O<sub>3</sub> and the size distribution of Au nanoparticles (average: 3.2 nm,  $\sigma$ : 1.1 nm). The size distribution was determined using 200 particles.

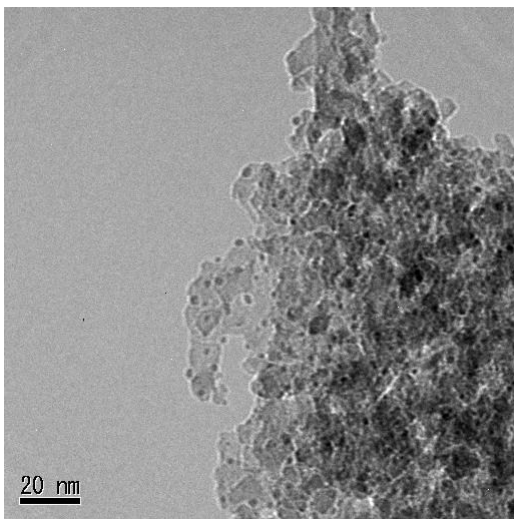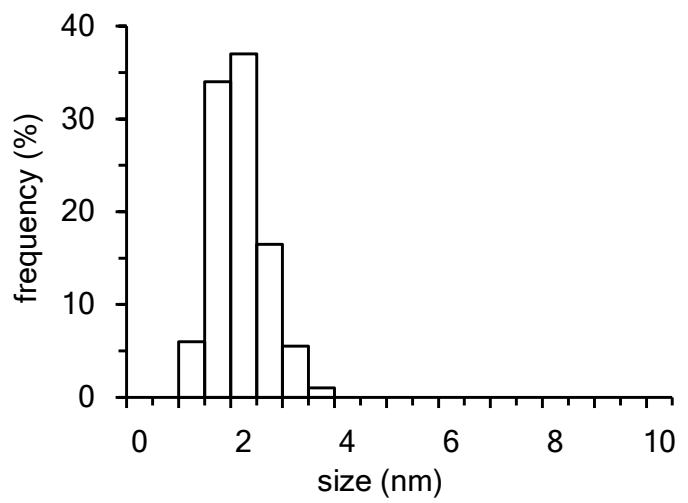

**Fig. S4** TEM image of Pd/Al<sub>2</sub>O<sub>3</sub> and the size distribution of Pd nanoparticles (average: 2.2 nm,  $\sigma$ : 0.5 nm). The size distribution was determined using 200 particles.

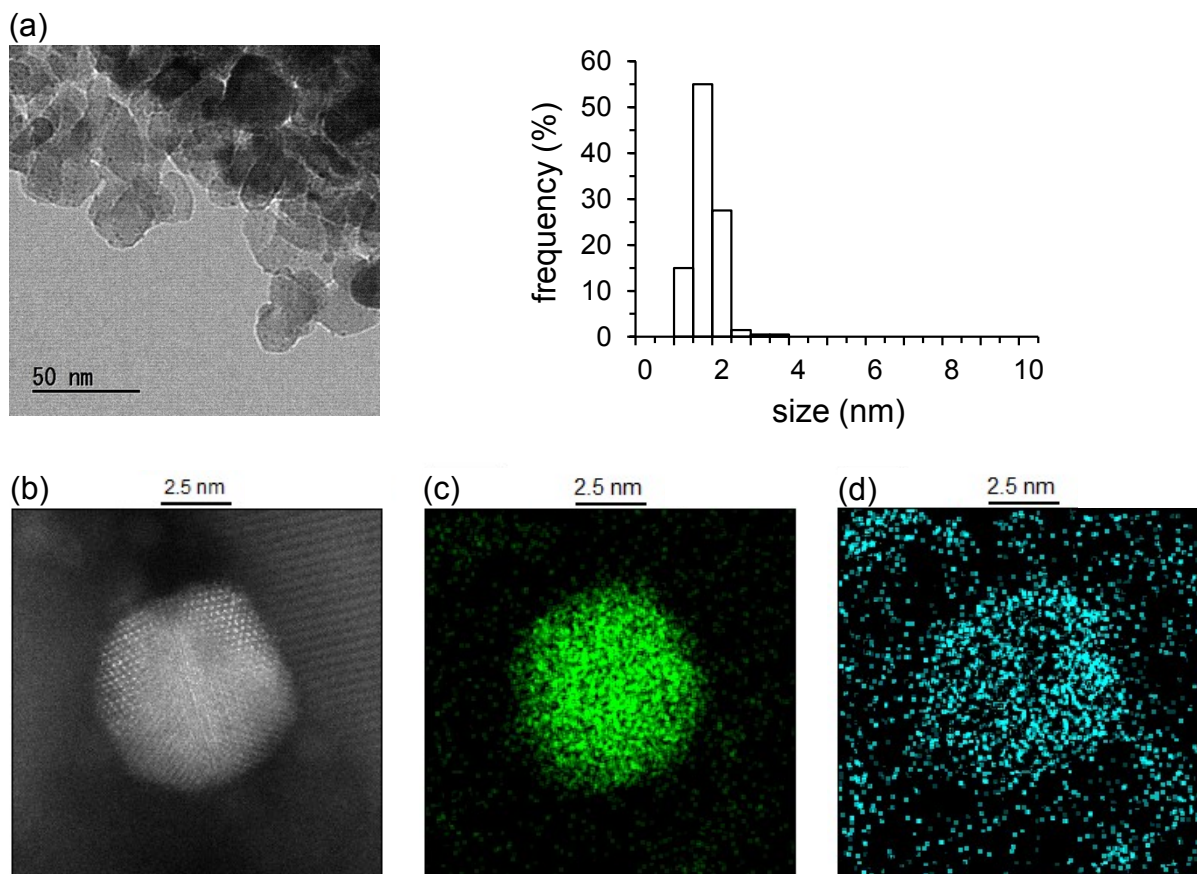

**Fig. S5** (a) TEM image of Au-Pd/TiO<sub>2</sub> and the size distribution of bimetallic nanoparticles (average: 1.8 nm,  $\sigma$ : 0.4 nm). The size distribution was determined using 200 particles. (b) HAADF-STEM image of Au-Pd/TiO<sub>2</sub>. (c) EDS images (Au element) of Au-Pd/TiO<sub>2</sub>. (d) EDS images (Pd element) of Au-Pd/TiO<sub>2</sub>. Green: Au, Blue: Pd.

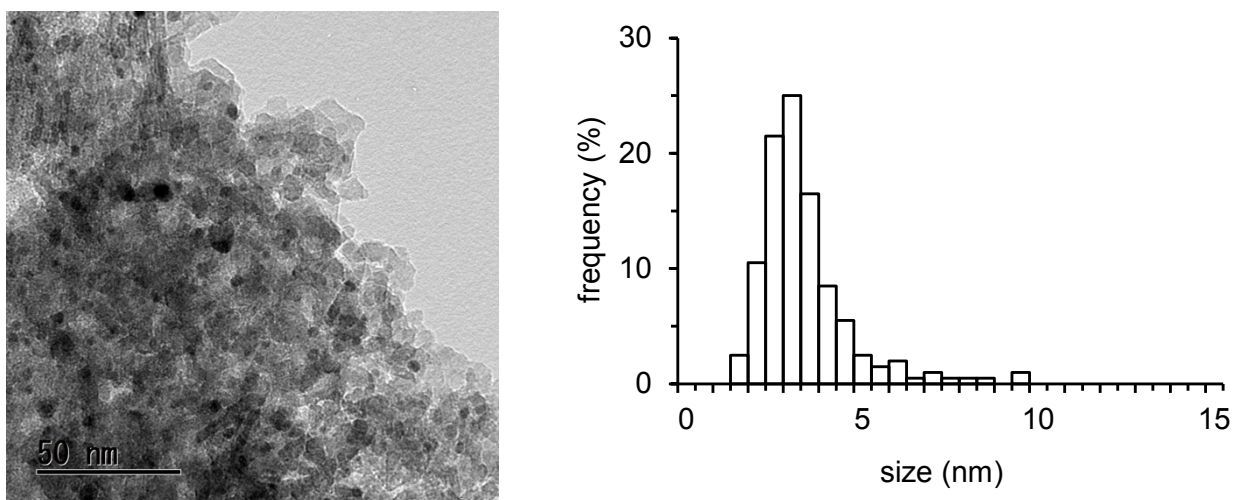

**Fig. S6** TEM image of Au-Pd/Al<sub>2</sub>O<sub>3</sub>(Pd→Au) and the size distribution of bimetallic nanoparticles (average: 3.5 nm,  $\sigma$ : 1.3 nm). The size distribution was determined using 200 particles.



(a)

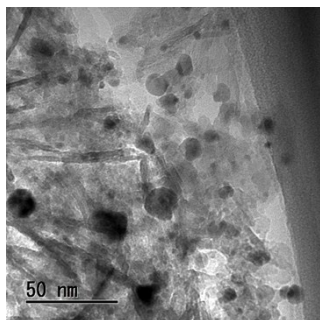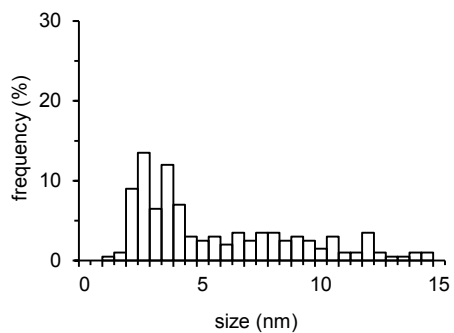

(b)

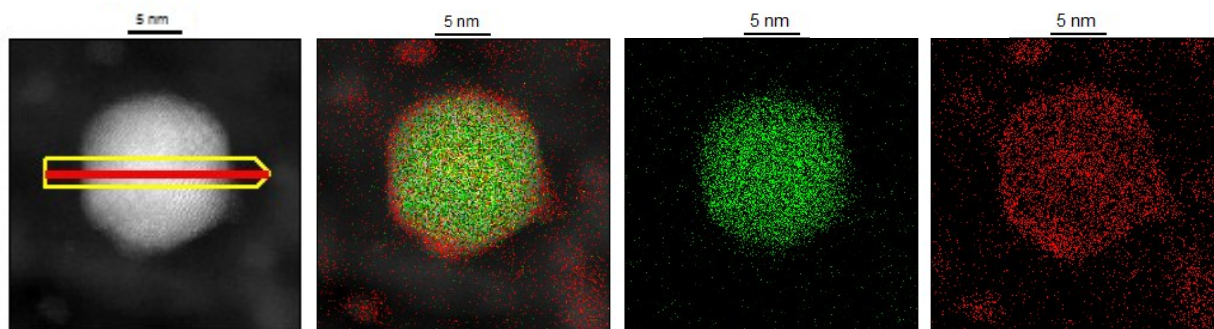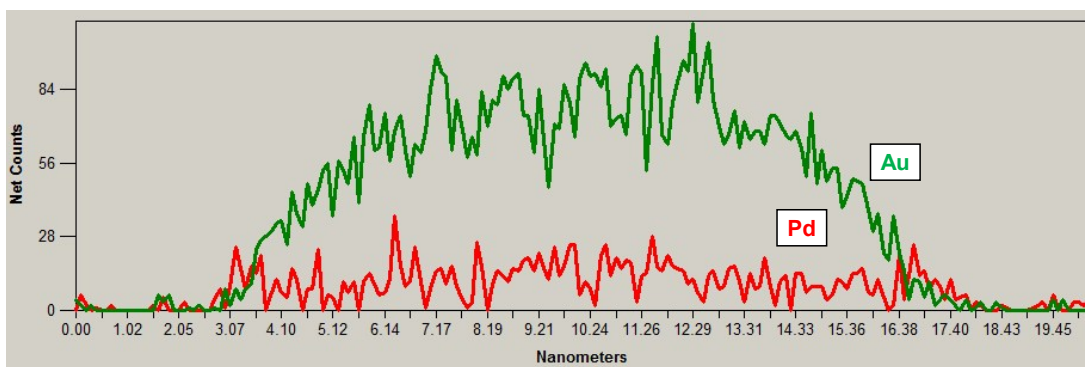

(c)

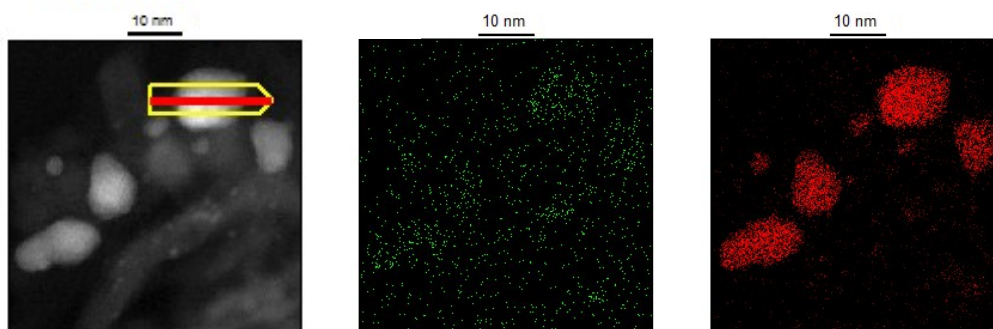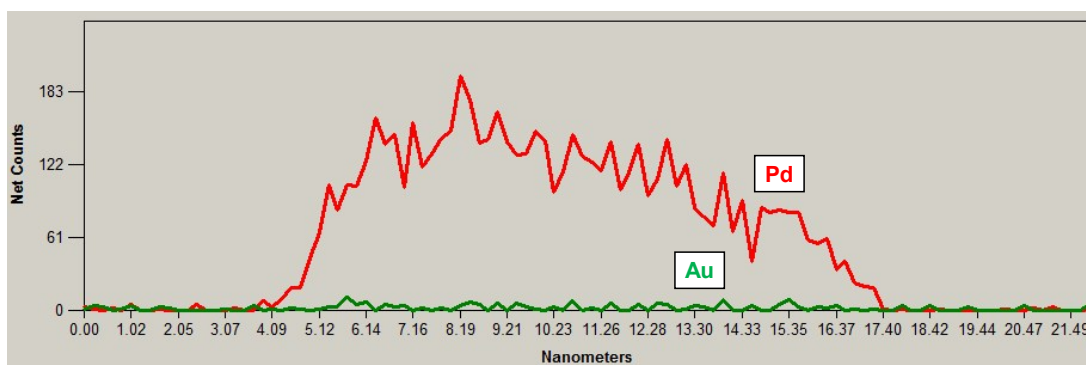

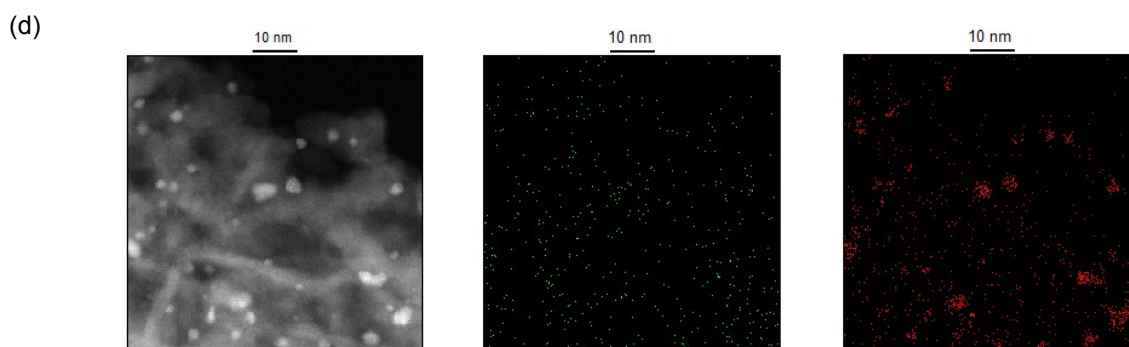

**Fig. S7** (a) TEM image of Au–Pd/Al<sub>2</sub>O<sub>3</sub>(Au→Pd) and the size distribution of bimetallic nanoparticles. Au–Pd/Al<sub>2</sub>O<sub>3</sub>(Au→Pd) has wide size distribution (average: 6.3 nm,  $\sigma$ : 4.1 nm). The size distribution was determined using 200 particles. (b) HAADF-STEM and EDS images and cross-sectional compositional line profiles of large nanoparticles consisting of Au<sub>core</sub>–Pd<sub>shell</sub>. (c) HAADF-STEM and EDS images and cross-sectional compositional line profiles of large nanoparticles consisting of palladium. (d) HAADF-STEM and EDS images of small nanoparticles consisting of palladium. Green: Au, Red: Pd.



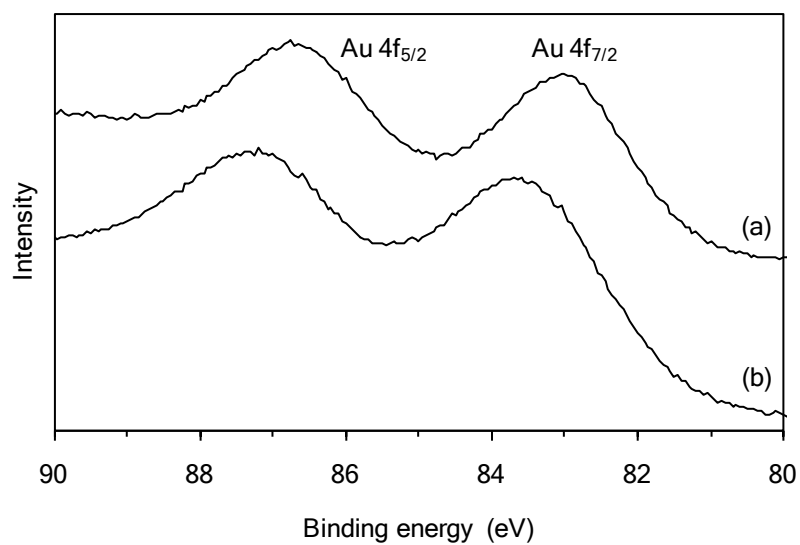

**Fig. S8** XPS spectra of (a) Au-Pd/Al<sub>2</sub>O<sub>3</sub> and (b) Au/Al<sub>2</sub>O<sub>3</sub> around Au 4f components. The two peaks were attributed to Au 4f<sub>7/2</sub> (around 83.0 eV) and 4f<sub>5/2</sub> (around 87.0 eV). Au-Pd/Al<sub>2</sub>O<sub>3</sub> exhibited negative shifts in the Au 4f binding energies in comparison with Au/Al<sub>2</sub>O<sub>3</sub>, suggesting the electron-transfer from palladium to gold atoms by alloying. Such phenomena have frequently observed for Au-Pd alloy nanoparticle catalysts (for example, see ref. 10).

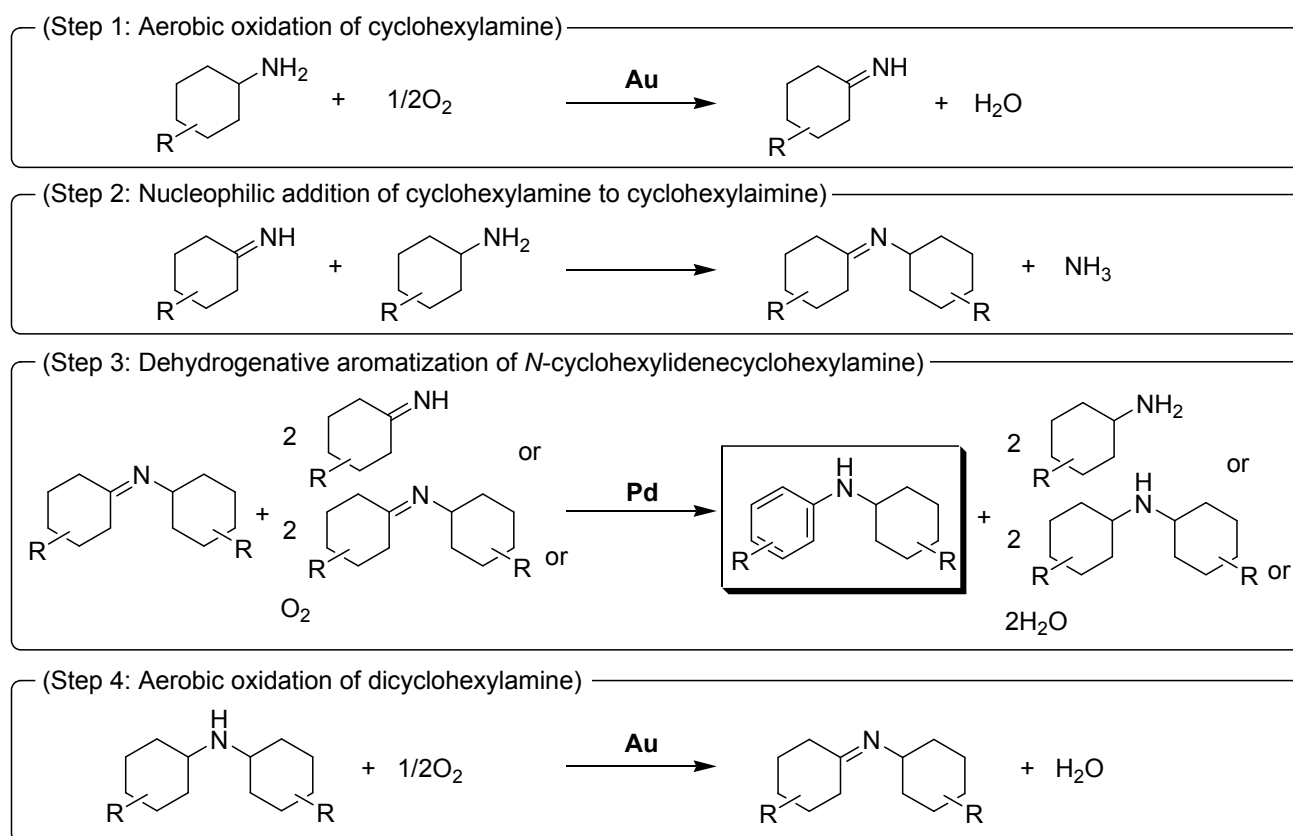

**Scheme S1.** Proposed reaction pathway for our recently reported Au–Pd/Al<sub>2</sub>O<sub>3</sub>-catalyzed dehydrogenative aromatization system from cyclohexylamines (see ref. 9). Initially, aerobic dehydrogenation of cyclohexylamine proceeds to give cyclohexylimine (step 1). Then, nucleophilic addition of another cyclohexylamine molecule to the cyclohexylimine intermediate takes place to afford *N*-cyclohexylidencyclohexylamine (step 2). Finally, disproportionation and/or aerobic dehydrogenation of the *N*-cyclohexylidencyclohexylamine proceeds to give the corresponding *N*-cyclohexylaniline as the final product with the concurrent formation of cyclohexylamine and dicyclohexylamine (step 3). These amines formed in the aromatization step can again aerobically be oxidized, and thus it can be considered that O<sub>2</sub> is formally the terminal oxidant (step 4).
